# Supplementary material
Source: Royal Society of Chemistry journal article supplement (doi:10.1039/d6em00042h)
Supplement: d6em00042h1.pdf [file d6em00042h1.pdf]

Supplemental Information for

**Perfluoroalkyl Acid Precursor Discharge from Engineered Water Systems:  
Composition and Treatment Impacts**

Lois D. Arku, Juhe Liu, and Joseph A. Charbonnet

Department of Civil, Construction and Environmental Engineering, Iowa State University,  
Ames, IA, 50011

Limits of quantification were defined as the lowest concentration within the calibration range exceeding twice the blank response area. Wastewater values represent average LOQs across two sampling phases (n=2) at six treatment plants; stormwater values represent single events at eight sites across three cities. Both SPE and TOP assay methods are included.

**Table S1.** Limits of Quantification (LOQ) for Target PFAS in Wastewater and Stormwater Samples

| Compound     | Wastewater               |                                | Stormwater          |                           | Standard Type |
|--------------|--------------------------|--------------------------------|---------------------|---------------------------|---------------|
|              | LOQ (ng/L)<br>(SPE, n=2) | LOQ (ng/L)<br>(TOP Assay, n=2) | LOQ (ng/L)<br>(SPE) | LOQ (ng/L)<br>(TOP Assay) |               |
| PFBA         | 3.39                     | 9.29                           | 74.50               | 129.60                    | ESI-          |
| PFPeA        | 4.03                     | 5.07                           | 65.70               | 31.60                     | ESI-          |
| PFHxA        | 0.08                     | 2.15                           | 69.80               | 11.60                     | ESI-          |
| PFHpA        | 0.08                     | 0.84                           | 3.60                | 3.70                      | ESI-          |
| PFOA         | 0.06                     | 0.20                           | 4.40                | 3.20                      | ESI-          |
| PFNA         | 0.06                     | 0.80                           | 11.60               | 4.40                      | ESI-          |
| PFDA         | 0.13                     | 0.52                           | 3.3                 | 4.56                      | ESI-          |
| PFUdA        | 0.28                     | 0.79                           | N. A                | 4.30                      | ESI-          |
| PFDoA        | 0.20                     | 1.04                           | 48.50               | 6.50                      | ESI-          |
| PFTTrDA      | 0.07                     | 0.38                           | 0.60                | 3.40                      | ESI-          |
| PFTeDA       | 0.20                     | 0.68                           | 3.10                | 7.40                      | ESI-          |
| FOSA         | 0.05                     | 1.55                           | 14.20               | 30.10                     | ESI-          |
| br-NMeFOSAA  | 0.81                     | 3.01                           | 33.10               | 10.80                     | ESI-          |
| br-NEtFOSAA  | 0.93                     | 19.62                          | 77.50               | 68.00                     | ESI-          |
| PFBS         | 0.07                     | 0.32                           | 5.9                 | 3.00                      | ESI-          |
| PFPeS        | 0.12                     | 0.38                           | 0.80                | 61.80                     | ESI-          |
| PFHxS        | 0.21                     | 0.57                           | 0.50                | 11.10                     | ESI-          |
| PFHpS        | 0.09                     | 1.15                           | 3.40                | 3.00                      | ESI-          |
| PFOS         | 0.24                     | 0.99                           | 2.90                | 1.20                      | ESI-          |
| PFNS         | 0.20                     | 0.87                           | 2.60                | 35.10                     | ESI-          |
| PFDS         | 0.45                     | 2.06                           | N. A                | N. A                      | ESI-          |
| PFDoS        | 0.16                     | 0.92                           | 73.10               | 64.40                     | ESI-          |
| 4:2 FTS      | 0.31                     | 0.98                           | 41.50               | 13.30                     | ESI-          |
| 6:2 FTS      | 2.33                     | 17.54                          | 158.20              | 169.20                    | ESI-          |
| 8:2 FTS      | 0.83                     | 1.62                           | 146.10              | 27.30                     | ESI-          |
| HFPO-DA      | N. A                     | N. A                           | 114.80              | 368.00                    | ESI-          |
| NaDONA       | 0.07                     | 0.23                           | 1.80                | 0.80                      | ESI-          |
| 9Cl-PF3ONS   | 0.59                     | 4.73                           | 621.00              | 32.70                     | ESI-          |
| 11Cl-PF3OUdS | 0.21                     | 1.90                           | 109.80              | 14.50                     | ESI-          |
| PMPA         | 0.18                     | 0.78                           | 8.20                | 2.50                      | ESI-          |

|              |      |      |       |       |           |
|--------------|------|------|-------|-------|-----------|
| PMBA         | 0.44 | 0.48 | 0.80  | 3.50  | ESI-      |
| NFDHA        | 0.22 | 1.32 | 7.30  | 13.40 | ESI-      |
| PFEESA       | 0.09 | 0.43 | 0.90  | 0.30  | ESI-      |
| N-MeFOSA     | 0.15 | 2.01 | 0.30  | 0.90  | ESI-      |
| N-EtFOSA     | 0.18 | 1.11 | 40.30 | 33.70 | ESI-      |
| N-MeFOSE     | 0.15 | 0.49 | 4.00  | 1.60  | ESI-      |
| N-EtFOSE     | 0.10 | 0.27 | 2.00  | 8.00  | ESI-      |
| 3:3 FTCA     | N.A  | N.A  | N.A   | N.A   | ESI-      |
| 5:3 FTCA     | 0.41 | 3.03 | 41.90 | 13.40 | ESI-      |
| 7:3 FTCA     | 0.74 | 4.26 | 20.1  | 22.3  | ESI+      |
| AmPr-FHxSA   | 0.16 | 1.15 | 4.70  | 3.80  | ESI+      |
| 6:2FTAB      | 0.27 | 1.04 | 5.50  | 4.20  | ESI+      |
| 5:3FTB       | 0.06 | 0.59 | 4.00  | 1.63  | ESI+      |
| M3PFBA       |      |      |       |       | Internal  |
| M2PFHxA      |      |      |       |       | Internal  |
| M2PFOA       |      |      |       |       | Internal  |
| M2PFDA       |      |      |       |       | Internal  |
| M3HFPO-DA    |      |      |       |       | Internal  |
| M4PFOS       |      |      |       |       | Internal  |
| d5-N-EtFOSAA |      |      |       |       | Internal  |
| Atrazine-d5  |      |      |       |       | Surrogate |
| M8FOSA       |      |      |       |       | Surrogate |
| M8PFOA       |      |      |       |       | Surrogate |
| M8PFOS       |      |      |       |       | Surrogate |

**Table S2.** WWTP Flows and Sample Dates

| Plant | Sampling Phase | Date       | Day of Week | Flow (MGD) |
|-------|----------------|------------|-------------|------------|
| A     | 1              | 10-28-2022 | Friday      | 43.1       |
|       | 2              | 9-21-2023  | Thursday    | 46.5       |
| B     | 1              | 8-19-2022  | Friday      | 20.5       |
|       | 2              | 8-10-2023  | Thursday    | 21.3       |
| C     | 1              | 8-18-2022  | Thursday    | 7.33       |
|       | 2              | 8-9-2023   | Wednesday   | 6.41       |
| D     | 1              | 8-3-2022   | Wednesday   | 5.43       |
|       | 2              | 6-24-2023  | Saturday    | 6.48       |
| E     | 1              | 8-19-2022  | Friday      | 1.8        |
|       | 2              | 8-9-2023   | Wednesday   | 1.75       |
| F     | 1              | 1-30-2023  | Monday      | 1.02       |
|       | 2              | 9-29-2023  | Friday      | 0.942      |

**Table S3.** Stormwater sampling data. (Precipitation data from the National Weather Service)<sup>1</sup>

| City | Site | Land Use Category | Date | Sampling | Total storm |
|------|------|-------------------|------|----------|-------------|
|------|------|-------------------|------|----------|-------------|

| ID |     |                      |            | Time    | rainfall (in.) |
|----|-----|----------------------|------------|---------|----------------|
| C  | C-1 | Residential          | 2023-09-11 | 9:09 AM | 0.67           |
| C  | C-2 | Commercial/downtown  | 2023-09-11 | 9:33 AM | 0.67           |
| D  | D-1 | Residential          | 2023-06-24 | 4:45 PM | 0.91           |
| D  | D-2 | University campus    | 2023-06-24 | 5:15 PM | 0.91           |
| D  | D-3 | Educational facility | 2023-06-24 | 5:30 PM | 0.91           |
| D  | D-4 | Creek outfall        | 2023-06-24 | 6:00 PM | 0.91           |
| E  | E-1 | Residential          | 2023-08-11 | 5:15 AM | 1.06           |
| E  | E-2 | Residential          | 2023-08-11 | 5:30 AM | 1.06           |

**Table S4.** Quality Assurance/Quality Control measures.

| QA/QC                               | Frequency                        | Stage    |
|-------------------------------------|----------------------------------|----------|
| Field blank                         | 1 per sample location            | Sampling |
| Trip blank                          | 1 per sampling location per trip | Sampling |
| Field replicate                     | Every 10 samples                 | Sampling |
| Method blank                        | Every 20 injections              | Analysis |
| Instrument blank                    | Every 20 injections              | Analysis |
| Continuing calibration verification | Every 10 injections              | Analysis |

**Table S5.** Aqueous sample preparation.

| Component                     | Volume ( $\mu$ l) |
|-------------------------------|-------------------|
| Sample                        | 890               |
| 80:20 methanol-water mix      | 235               |
| Trifluoroethanol              | 150               |
| Isopropyl alcohol             | 130               |
| Basic-water solution          | 45                |
| Dilute surrogate standard mix | 50                |

### **Text S1. Chromatographic Eluents**

The aqueous phase was made of 2% LCMS-grade methanol, 2 mM LCMS-grade ammonium acetate, and 0.1% acetic acid in Milli-Q water ( $R = 18.2 \text{ M}\Omega$ ). The organic phase was 2% Milli-Q water, 2 mM LCMS-grade ammonium acetate, and 0.1% acetic acid in methanol.

**Table S6.** Eluent gradient.

| Time (min) | % Aqueous solvent | % Organic solvent |
|------------|-------------------|-------------------|
| 0          | 80                | 20                |
| 1          | 50                | 50                |
| 15         | 0                 | 100               |
| 16.5       | 0                 | 100               |
| 16.7       | 80                | 20                |
| 20         | 80                | 20                |

**Table S7.** MS Source Parameters

| Parameter                     | ESI- setpoint | ESI+ setpoint |
|-------------------------------|---------------|---------------|
| Spray Voltage                 | 1000 V        | 3500 V        |
| Ion Transfer Tube Temperature | 250 °C        | 250 °C        |
| Vaporizer Temperature         | 225 °C        | 225 °C        |
| Sheath Gas                    | 50            | 50            |
| Aux Gas                       | 12            | 12            |
| Sweep Gas                     | 0.5           | 0.5           |

**Text S2. Solid-Phase Extraction (SPE) Procedure***Cartridge Preparation and System Setup*

Each SPE cartridge was packed approximately halfway with silanized glass wool to reduce the potential for clogging during sample processing, particularly for samples containing suspended solids. The cartridges were mounted onto a vacuum manifold positioned inside an SPE-designated fume hood. All manifold valves remained fully closed prior to extraction to maintain consistent vacuum pressure and ensure controlled flow rates throughout the procedure.

Reservoirs were constructed by modifying 30 mL polypropylene syringes (removal of the external Luer lock) and were attached to the cartridges using reservoir adapters to create a sealed flow path. Both the vacuum pump and manifold outlets were connected to a single waste collection vessel. Prior to extraction, samples were fortified with a known mass of an internal standard not included in the calibration-standard mixture. This spike allowed calculation of SPE recoveries (Table S8).

*Cartridge Conditioning*

Before introducing samples, cartridges were conditioned with 15 mL of 1% methanolic ammonium hydroxide followed by 5 mL of 0.3 M formic acid. Conditioning solutions were pipetted directly into the cartridge in 5 mL aliquots and drawn through using low vacuum. All conditioning waste was collected in the SPE waste vessel.

*Sample Loading*

With the vacuum engaged, samples were transferred into the reservoir and pulled through each cartridge at a controlled flow rate of approximately 5 mL min<sup>-1</sup>. Original sample bottles were retained and allowed to air-dry for later rinsing. When clogging occurred, the remaining sample volume was passed through a second, preconditioned cartridge to ensure complete processing.

Following sample percolation, the reservoir was rinsed twice with 5 mL of ultrapure water and then with 5 mL of a 1:1 (v/v) 0.1 M formic acid/methanol solution. The cartridge was dried for 15 s by drawing ambient air through the system. Rinse solutions were periodically discarded from the manifold or attached waste vessel depending on fluid accumulation.

*Recovery Rinse and Elution*

A 15 mL polypropylene collection tube was placed beneath each manifold port to capture the eluate. The original sample bottle was rinsed with 5 mL of 1% methanolic ammonium hydroxide, and this rinse was transferred into the reservoir to wash and elute target compounds from the SPE cartridge. Vacuum was applied to pull the solution through at approximately 5 mL min<sup>-1</sup>.

*Extract Clean-Up and Final Processing*

Collected eluates were acidified by adding 25 µL of concentrated acetic acid (equal to the stock strength). Ten milligrams of powdered carbon were added to each collection tube to capture particulate material; the mixture was shaken by hand for 15–30 s until phase separation was visible, followed by vortexing for 30 s. Samples were centrifuged for 10 min at 2800 rpm with balanced tube masses.

After centrifugation, 5 mL of supernatant was withdrawn using a syringe fitted with a 0.2 µm nylon filter and transferred into labeled LC-compatible vials. Extracts were stored under refrigeration until LC-MS/MS analysis.

**Table S8.** Recovery rates of M4PFOA for SPE (Pre-TOP Assay).

| <b>Wastewater Treatment Plant</b> |                    |     |
|-----------------------------------|--------------------|-----|
| A                                 | Mean               | 78% |
|                                   | Standard Deviation | 11% |
| B                                 | Mean               | 90% |
|                                   | Standard Deviation | 10% |
| C                                 | Mean               | 88% |
|                                   | Standard Deviation | 13% |
| D                                 | Mean               | 94% |
|                                   | Standard Deviation | 13% |
| E                                 | Mean               | 83% |
|                                   | Standard Deviation | 10% |
| F                                 | Mean               | 82% |
|                                   | Standard Deviation | 10% |
| <b>Stormwater Site</b>            |                    |     |
| C-1 Intersection (Residential)    | Mean               | 59% |
|                                   | Standard Deviation | 8%  |
| C-2 Intersection (Downtown)       | Mean               | 51% |
|                                   | Standard Deviation | 12% |
| D-1 Creek (Residential)           | Mean               | 89% |
|                                   | Standard Deviation | 10% |
| D-2 Creek (University)            | Mean               | 58% |
|                                   | Standard Deviation | 59% |
| D-3 Highschool Outfall            | Mean               | 65% |
|                                   | Standard Deviation | 20% |

|                        |                    |      |
|------------------------|--------------------|------|
| D-4 Golf Course        | Mean               | 59%  |
|                        | Standard Deviation | 7%   |
| E-1 Agricultural Drain | Mean               | 51%  |
|                        | Standard Deviation | 20%  |
| E-2 Urban Pond         | Mean               | 125% |
|                        | Standard Deviation | 33%  |

**Table S9.** Recovery rates of M8PFOA from M8FOSA for TOP assay.

**Wastewater Treatment Plant**

|   |                    |       |
|---|--------------------|-------|
| A | Mean               | 75.1% |
|   | Standard Deviation | 11.8% |
| B | Mean               | 66.0% |
|   | Standard Deviation | 7.7%  |
| C | Mean               | 76.0% |
|   | Standard Deviation | 18.8% |
| D | Mean               | 78.7% |
|   | Standard Deviation | 15.0% |
| E | Mean               | 64.0% |
|   | Standard Deviation | 11.6% |
| F | Mean               | 73.3% |
|   | Standard Deviation | 12.8% |

**Stormwater Site**

|                                |                    |     |
|--------------------------------|--------------------|-----|
| C-1 Intersection (Residential) | Mean               | 56% |
|                                | Standard Deviation | 14% |
| C-2 Intersection (Downtown)    | Mean               | 55% |
|                                | Standard Deviation | 8%  |
| D-1 Creek (Residential)        | Mean               | 46% |
|                                | Standard Deviation | 3%  |
| D-2 Creek (University)         | Mean               | 44% |
|                                | Standard Deviation | 3%  |
| D-3 High School Outfall        | Mean               | 41% |
|                                | Standard Deviation | 1%  |
| D-4 Golf Course                | Mean               | 49% |
|                                | Standard Deviation | 1%  |
| E-1 Agricultural Drain         | Mean               | 45% |
|                                | Standard Deviation | 6%  |
| E-2 Urban Pond                 | Mean               | 72% |
|                                | Standard Deviation | 6%  |

M8FOSA was below the LOQ in all post-TOP samples.

**Table S10.** Target PFAS Removal Efficiencies

| WWTP | Sampling Phase | $\Sigma$ Target PFAS in influent (ng/L) | $\Sigma$ Target PFAS in effluent (ng/L) | Removal Efficiency (%) |
|------|----------------|-----------------------------------------|-----------------------------------------|------------------------|
| A    | 1              | 43.6                                    | 70.8                                    | -62                    |
|      | 2              | 66.2                                    | 48.1                                    | 27                     |
| B    | 1              | 71.1                                    | 39.2                                    | 45                     |
|      | 2              | 66.6                                    | 37.1                                    | 44                     |
| C    | 1              | 73.1                                    | 182.7                                   | -150                   |
|      | 2              | 76.2                                    | 60.8                                    | 20                     |
| D    | 1              | 34.9                                    | 45.2                                    | -29                    |
|      | 2              | 78.2                                    | 62.1                                    | 21                     |
| E    | 1              | 108.1                                   | 230.9                                   | -114                   |
|      | 2              | 51.0                                    | 109.3                                   | -114                   |
| F    | 1              | 25.3                                    | 19.9                                    | 21                     |
|      | 2              | 26.8                                    | 53.1                                    | -98                    |

**Table S11.** Summary distribution of PFAS classes (ng/L) in primary/raw influent samples of wastewater treatment plants.

| WWTP | Sampling Phase | $\Sigma$ PFCA | $\Sigma$ PFSA | $\Sigma$ FTCA | $\Sigma$ FTSA | $\Sigma$ PFECA | $\Sigma$ FASA |
|------|----------------|---------------|---------------|---------------|---------------|----------------|---------------|
| A    | 1              | 16.40         | 15.99         | 3.37          | 7.48          | 0.33           | 0.00          |
|      | 2              | 29.36         | 23.17         | 0.00          | 13.66         | 0.00           | 0.00          |
| B    | 1              | 46.89         | 14.14         | 0.00          | 8.57          | 1.49           | 0.00          |
|      | 2              | 35.22         | 13.69         | 16.33         | 0.00          | 0.63           | 0.74          |
| C    | 1              | 48.73         | 4.69          | 19.68         | 0.00          | 0.00           | 0.00          |
|      | 2              | 52.76         | 5.31          | 18.13         | 0.00          | 0.00           | 0.00          |
| D    | 1              | 16.59         | 12.75         | 3.16          | 0.00          | 0.00           | 2.40          |
|      | 2              | 52.11         | 15.71         | 8.56          | 0.00          | 0.00           | 1.83          |
| E    | 1              | 99.29         | 3.99          | 4.85          | 0.00          | 0.00           | 0.00          |
|      | 2              | 25.99         | 4.44          | 1.14          | 4.84          | 0.15           | 14.45         |
| F    | 1              | 25.14         | 0.00          | 0.18          | 0.00          | 0.00           | 0.00          |
|      | 2              | 24.43         | 2.42          | 0.00          | 0.00          | 0.00           | 0.00          |

**Table S12.** Summary distribution of PFAS classes (ng/L) in secondary/final effluent samples of wastewater treatment plants.

| WWTP | Sampling Phase | $\Sigma$ PFCA | $\Sigma$ PFSA | $\Sigma$ FTCA | $\Sigma$ FTSA | $\Sigma$ PFECA | $\Sigma$ FASA | $\Sigma$ FOSAA |
|------|----------------|---------------|---------------|---------------|---------------|----------------|---------------|----------------|
| A    | 1              | 51.44         | 16.76         | 0.00          | 0.00          | 2.58           | 0.00          | 0.00           |
|      | 2              | 33.05         | 14.84         | 0.00          | 0.00          | 0.22           | 0.00          | 0.00           |
| B    | 1              | 27.91         | 10.60         | 0.00          | 0.00          | 0.67           | 0.00          | 0.00           |
|      | 2              | 25.90         | 10.85         | 0.00          | 0.00          | 0.63           | 0.00          | 0.00           |
| C    | 1              | 157.73        | 14.08         | 7.05          | 0.00          | 0.00           | 1.21          | 2.89           |
|      | 2              | 49.97         | 5.90          | 0.00          | 4.97          | 0.00           | 0.00          | 0.00           |
| D    | 1              | 25.74         | 13.34         | 0.00          | 0.00          | 0.00           | 6.11          | 0.00           |

|   |   |        |       |      |      |      |      |      |
|---|---|--------|-------|------|------|------|------|------|
| E | 2 | 44.21  | 12.65 | 2.04 | 0.00 | 0.00 | 5.69 | 0.00 |
|   | 1 | 222.77 | 8.14  | 0.00 | 0.00 | 0.00 | 0.00 | 0.00 |
| F | 2 | 102.91 | 6.35  | 0.00 | 0.00 | 0.00 | 0.00 | 0.00 |
|   | 1 | 19.88  | 0.00  | 0.00 | 0.00 | 0.00 | 0.00 | 0.00 |
|   | 2 | 38.82  | 14.24 | 0.00 | 0.00 | 0.00 | 0.00 | 0.00 |

**Table S13.** Summary of estimated mass of PFAS discharged from WWTPs.

| WWTP | Phase | Flow (MGD) | Target PFAS (ng/L) | Precursor PFAS (ng/L) | Total PFAS (ng/L) | Target Mass (g/yr) | Precursor Mass (g/yr) | Total Mass (g/yr) |
|------|-------|------------|--------------------|-----------------------|-------------------|--------------------|-----------------------|-------------------|
| A    | 1     | 43.10      | 70.79              | 60.29                 | 131.08            | 4215.46            | 3590.22               | 7805.68           |
|      | 2     | 46.50      | 48.12              | 14.43                 | 62.54             | 3091.40            | 926.93                | 4018.33           |
| B    | 1     | 20.50      | 39.17              | 93.34                 | 132.51            | 1109.59            | 2643.81               | 3753.40           |
|      | 2     | 21.30      | 37.09              | 56.64                 | 93.73             | 1091.52            | 1666.83               | 2758.35           |
| C    | 1     | 7.30       | 182.65             | 135.38                | 318.03            | 1842.26            | 1365.46               | 3207.72           |
|      | 2     | 6.40       | 60.83              | 62.99                 | 123.83            | 537.94             | 557.03                | 1094.96           |
| D    | 1     | 5.40       | 45.19              | 64.37                 | 109.56            | 337.17             | 480.25                | 817.42            |
|      | 2     | 6.50       | 62.11              | 71.85                 | 133.96            | 557.81             | 645.27                | 1203.07           |
| E    | 1     | 1.80       | 230.91             | 81.34                 | 312.26            | 574.28             | 202.30                | 776.59            |
|      | 2     | 1.75       | 109.26             | 54.68                 | 163.94            | 264.19             | 132.21                | 396.40            |
| F    | 1     | 1.00       | 19.88              | 47.49                 | 67.37             | 27.46              | 65.61                 | 93.08             |
|      | 2     | 0.90       | 53.06              | 26.89                 | 79.95             | 73.32              | 37.15                 | 110.47            |

**Table S14.** Summary of estimated mass of PFAS discharged from Stormwater Sites Sampled.\*

| Site ID | Rainfall (in) | Drainage Area (ac) | Runoff Coefficient | Runoff Depth (in) | Runoff Volume (ac-ft) | Runoff Volume (m <sup>3</sup> ) | Estimated Precursor (ng/L) | Estimated Precursor PFAS (g) | Total Estimated PFAS (ng/L) | Total Estimated PFAS (g) |
|---------|---------------|--------------------|--------------------|-------------------|-----------------------|---------------------------------|----------------------------|------------------------------|-----------------------------|--------------------------|
| C-1     | 0.67          | 25                 | 31.55              | 21.14             | 44.04                 | 54300                           | 13.00                      | 0.71                         | 22.00                       | 1.20                     |
| C-2     | 0.67          | 15                 | 67.55              | 45.26             | 56.57                 | 69800                           | 39.00                      | 2.72                         | 59.00                       | 4.12                     |
| D-1     | 0.91          | 50                 | 27.05              | 24.62             | 60                    | 12700                           | 24.00                      | 3.04                         | 38.00                       | 4.81                     |
| D-2     | 0.91          | 100                | 40.55              | 36.90             | 0                     | 37900                           | 23.00                      | 8.72                         | 29.00                       | 11.00                    |
| D-3     | 0.91          | 40                 | 36.05              | 32.81             | 5                     | 13500                           | 1.00                       | 0.13                         | 15.00                       | 2.02                     |
| D-4     | 0.91          | 60                 | 45.05              | 41.00             | 8                     | 25300                           | 9.00                       | 2.28                         | 29.00                       | 7.33                     |
| E-1     | 1.06          | 80                 | 25.25              | 26.77             | 3                     | 22000                           | 6.00                       | 1.32                         | 26.00                       | 5.72                     |

|     |      |    |       |       |   |       |       |   |       |      |        |       |
|-----|------|----|-------|-------|---|-------|-------|---|-------|------|--------|-------|
| E-2 | 1.06 | 80 | 25.25 | 26.77 | 3 | 178.4 | 22000 | 0 | 20.00 | 4.40 | 143.00 | 31.47 |
|-----|------|----|-------|-------|---|-------|-------|---|-------|------|--------|-------|

\*Notes and Assumptions:

1. Drainage area estimates are based on typical urban catchment sizes for each land use type
2. Impervious % based on literature values<sup>2,3</sup>
3. Runoff coefficient ( $R_v$ ) calculated using Simple Method<sup>4</sup>:  $R_v = 0.05 + 0.009 \times I$  (where  $I = \%$  impervious)
4. Runoff volume = Rainfall  $\times$  Drainage Area  $\times R_v$
5. These calculations are event-based estimates.

**Table S15.** Summary Molar Concentrations of PFAS in Wastewater Influent and Effluent Samples

| WWTP | Sampling Phase | Influent Concentrations (nM) |                      | Effluent Concentration (nM) |                      |
|------|----------------|------------------------------|----------------------|-----------------------------|----------------------|
|      |                | Untargeted PFAA Precursors   | Total Estimated PFAS | Untargeted PFAA Precursors  | Total Estimated PFAS |
| A    | 1              | 1.28                         | 1.31                 | 0.23                        | 0.23                 |
|      | 2              | 0.30                         | 0.32                 | 0.05                        | 0.05                 |
| B    | 1              | 0.21                         | 0.23                 | 0.38                        | 0.38                 |
|      | 2              | 0.64                         | 0.69                 | 0.24                        | 0.24                 |
| C    | 1              | 1.01                         | 1.06                 | 0.46                        | 0.48                 |
|      | 2              | 2.46                         | 2.51                 | 0.23                        | 0.25                 |
| D    | 1              | 0.35                         | 0.37                 | 0.23                        | 0.24                 |
|      | 2              | 0.50                         | 0.53                 | 0.28                        | 0.29                 |
| E    | 1              | 0.60                         | 0.61                 | 0.99                        | 0.99                 |
|      | 2              | 0.57                         | 0.61                 | 0.22                        | 0.22                 |
| F    | 1              | 0.41                         | 0.41                 | 0.21                        | 0.21                 |
|      | 2              | 1.11                         | 1.11                 | 0.12                        | 0.12                 |

**Table S16.** Summary Molar Concentrations of PFAS in Stormwater Samples.

| Site ID | PFAS Concentration (nM) |                      |
|---------|-------------------------|----------------------|
|         | Precursor PFAS          | Total Estimated PFAS |
| C-1     | 0.05                    | 0.09                 |
| C-2     | 0.12                    | 0.19                 |
| D-1     | 0.09                    | 0.15                 |
| D-2     | 0.10                    | 0.12                 |
| D-3     | 0.003                   | 0.07                 |
| D-4     | 0.03                    | 0.12                 |
| E-1     | 0.02                    | 0.10                 |
| E-2     | 0.09                    | 0.51                 |

**Table S17.** Solids Retention Times (SRTs) of the six municipal WWTPs studied.

| WWTP | SRT (days) |
|------|------------|
| A    | 12         |
| B    | 11         |
| C    | 14         |
| D    | 3          |
| E    | 0.7        |
| F    | 4          |

**Results: Concentrations and distributions of Target PFAS in WWTPs**

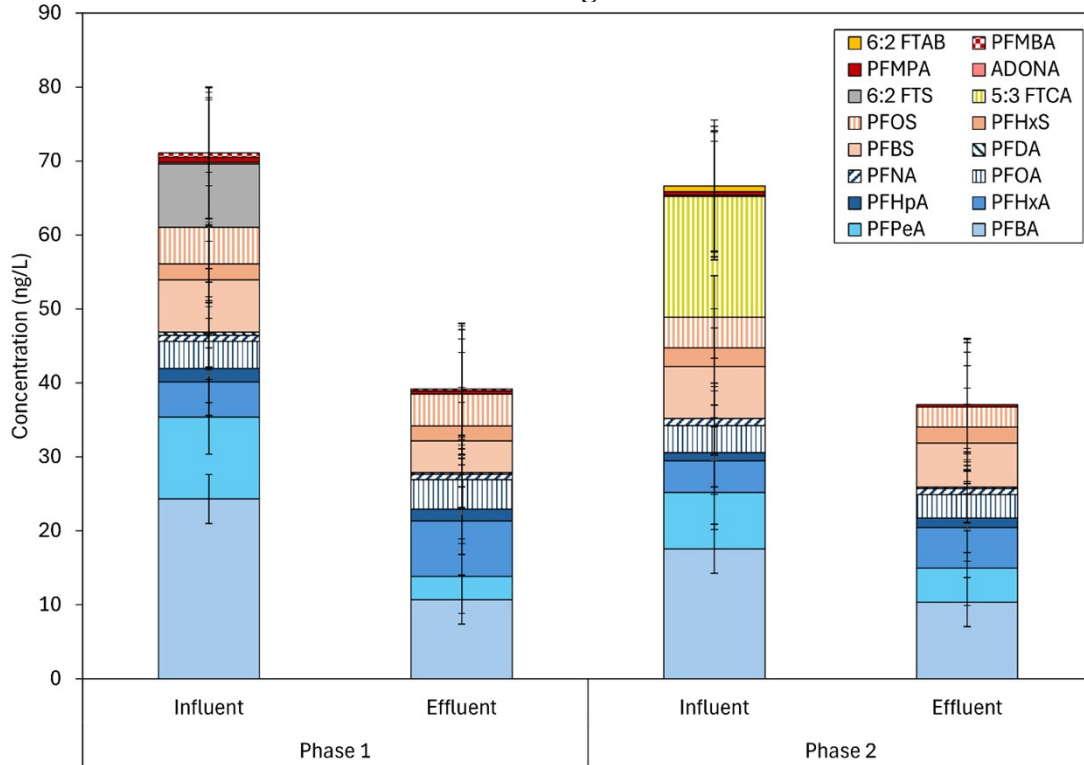

**Figure S1.** Target PFAS in WWTP B. Mean of triplicate samples; error bars represent standard errors.

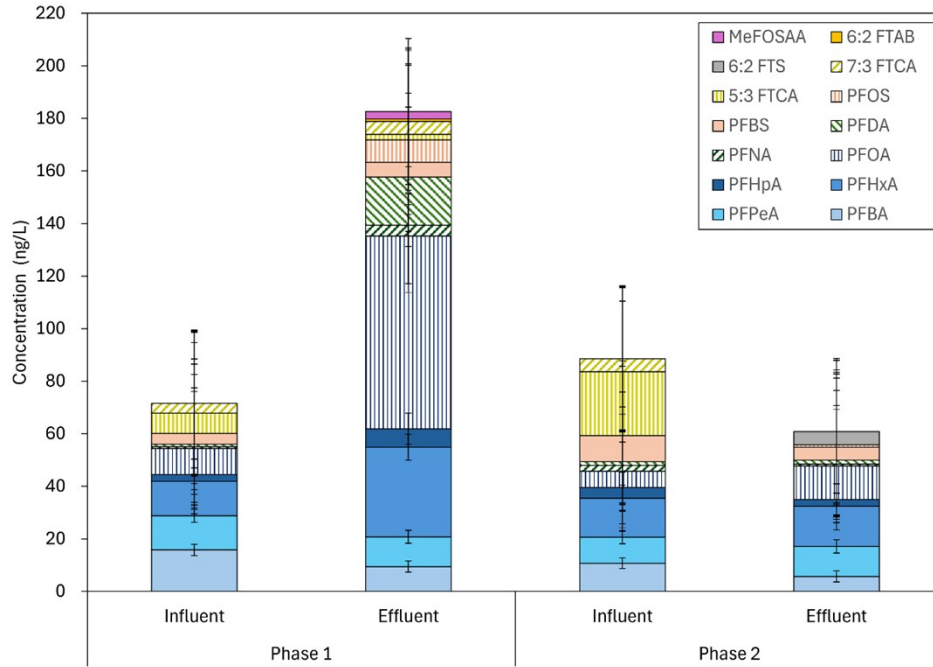

**Figure S2.** Target PFAS in WWTP C. Mean of triplicate samples; error bars represent standard errors.

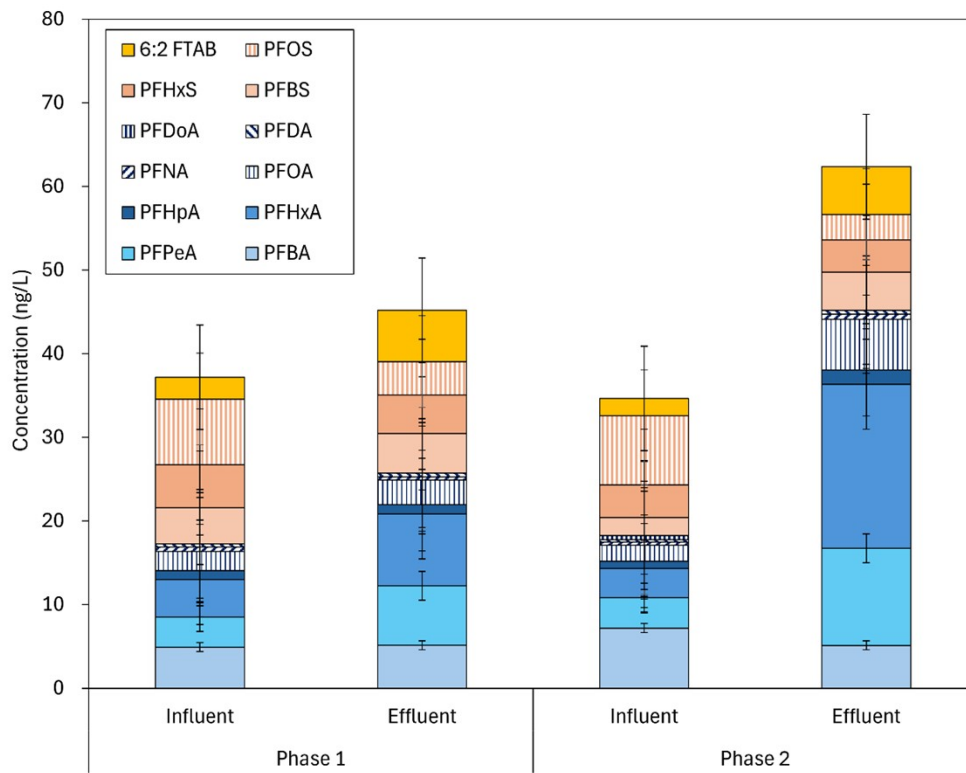

**Figure S3.** Target PFAS in WWTP D. Mean of triplicate samples; error bars represent standard errors.

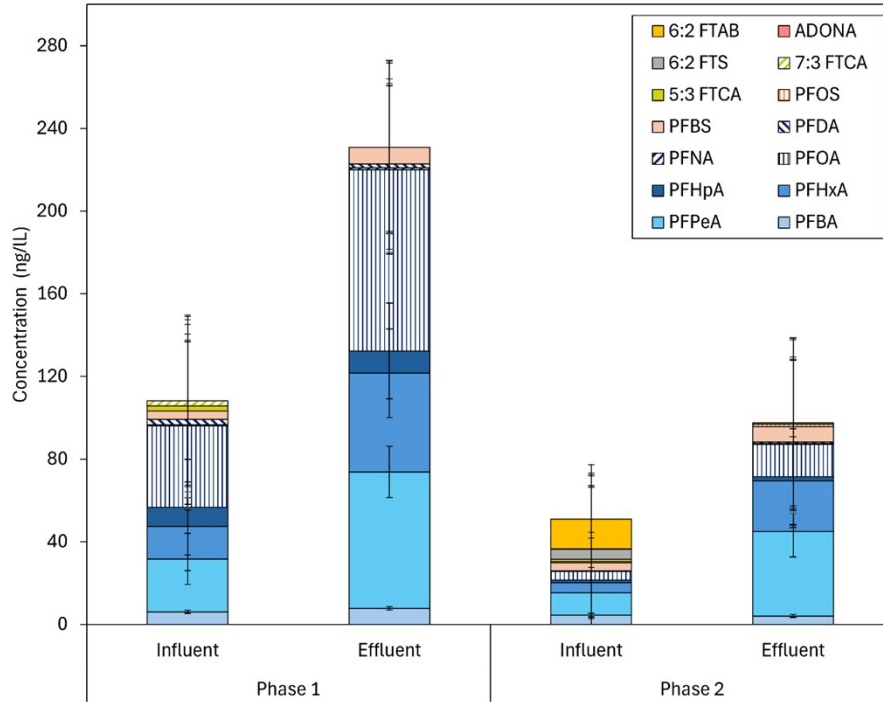

**Figure S4.** Target PFAS in WWTP E. Mean of triplicate samples; error bars represent standard errors.

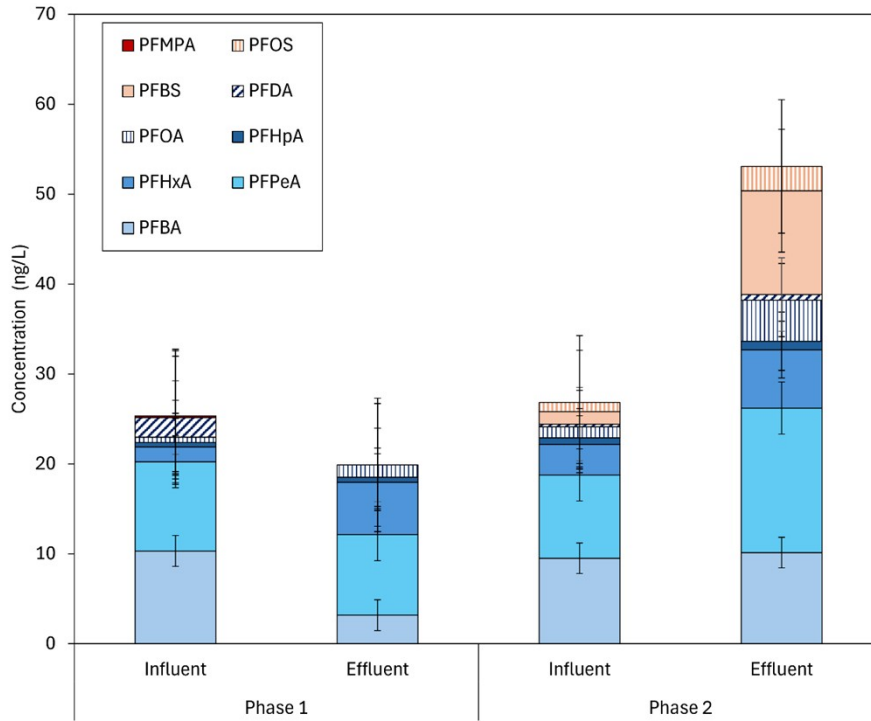

**Figure S5.** Target PFAS in WWTP F. Mean of triplicate samples; error bars represent standard errors.

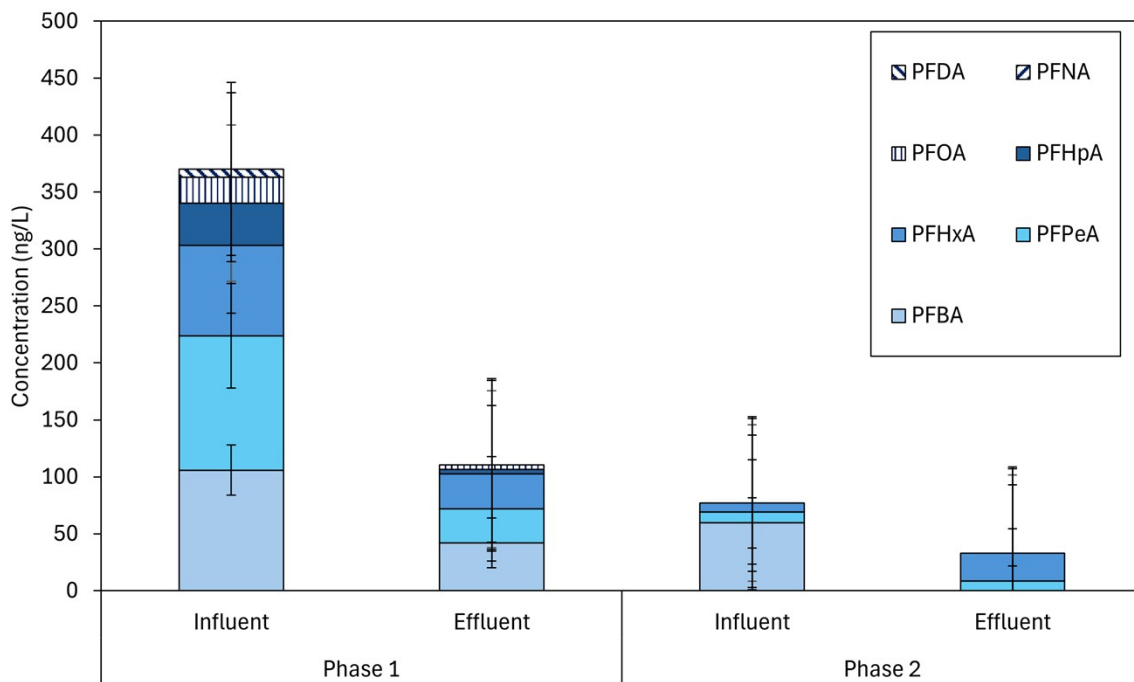

**Figure S6.** Distribution of PFAS Post-TOP Assay in WWTP A. Mean of triplicate samples; error bars represent standard errors.

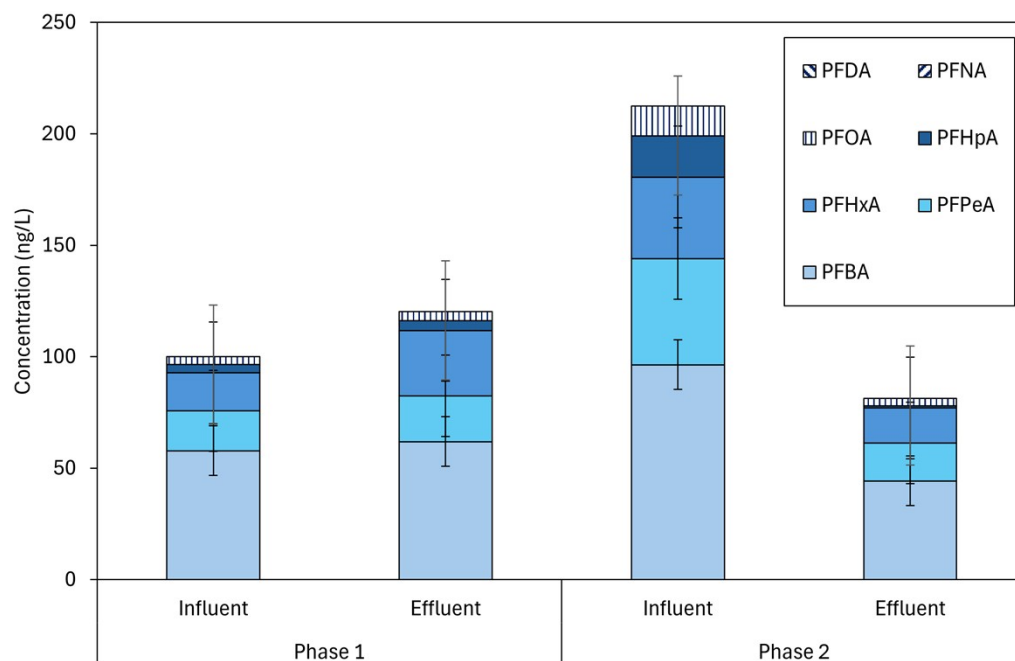

**Figure S7.** Distribution of PFAS Post-TOP Assay in WWTP B. Mean of triplicate samples; error bars represent standard errors.

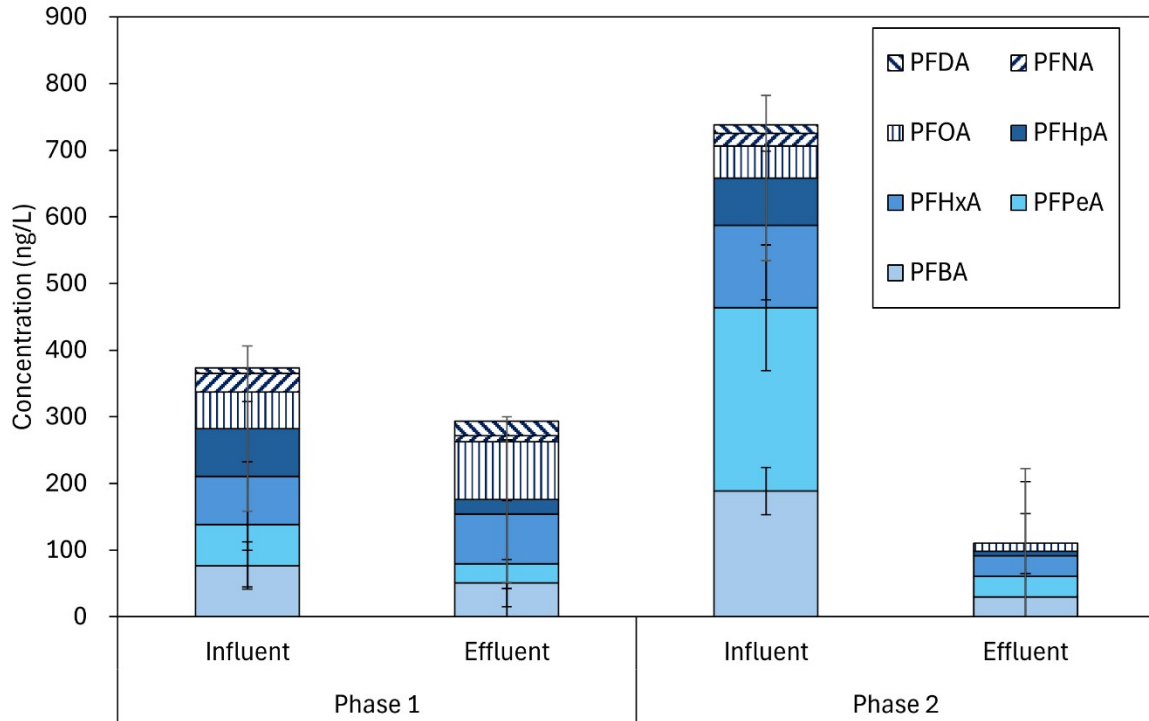

**Figure S8.** Distribution of PFAS Post-TOP Assay in WWTP C. Mean of triplicate samples; error bars represent standard errors.

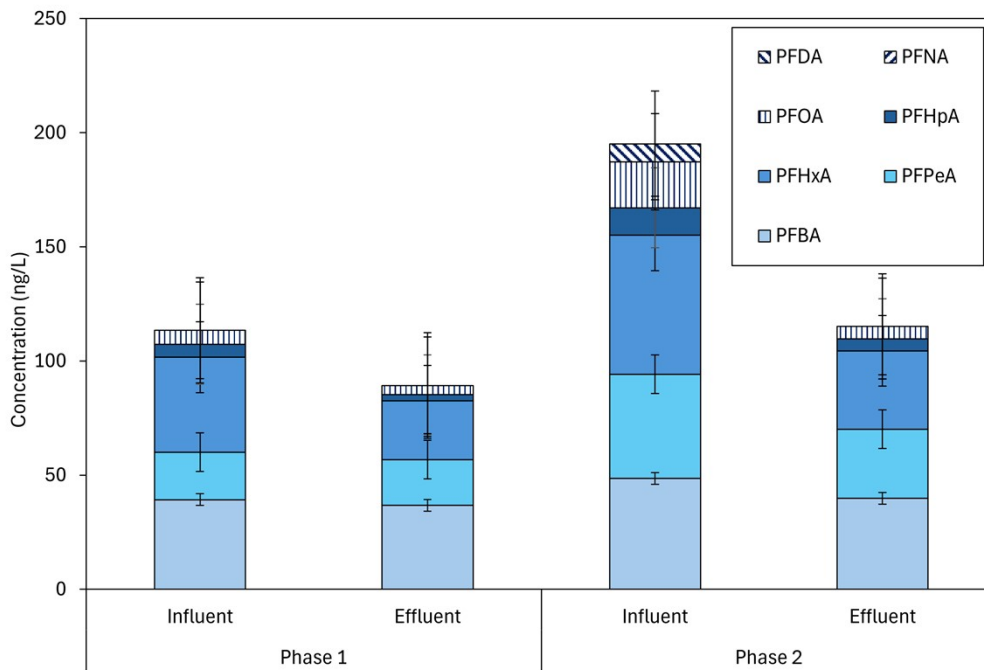

**Figure S9.** Distribution of PFAS Post-TOP Assay in WWTP D. Mean of triplicate samples; error bars represent standard errors.

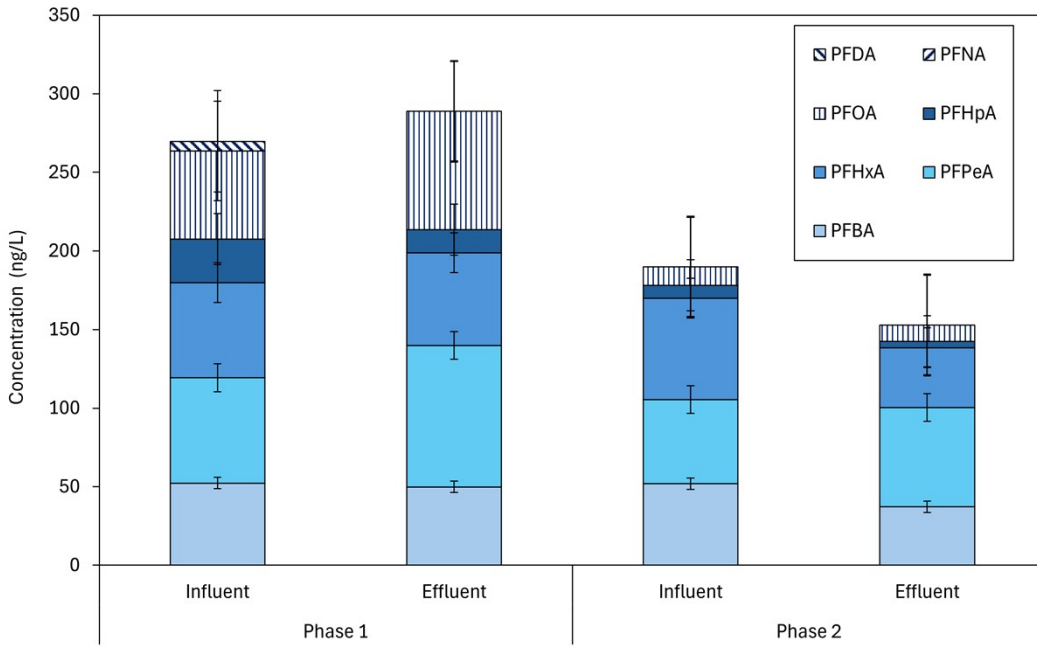

**Figure S10.** Distribution of PFAS Post-TOP Assay in WWTP E. Mean of triplicate samples; error bars represent standard errors.

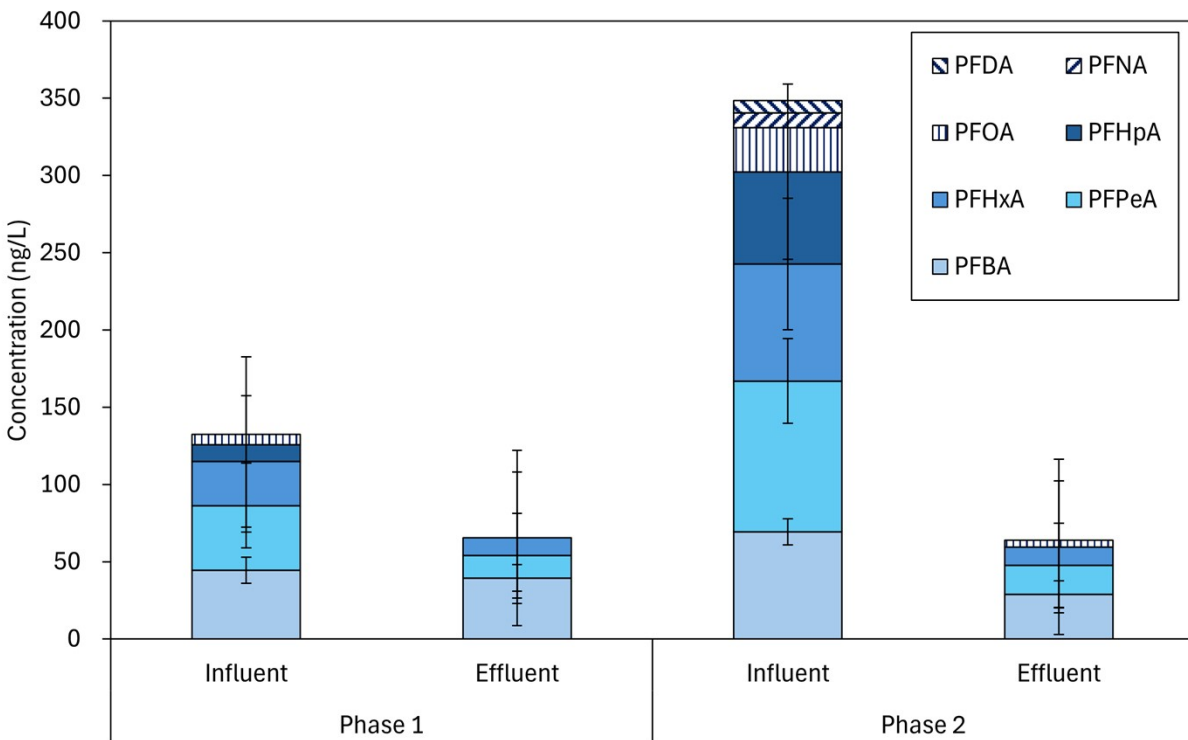

**Figure S11.** Distribution of PFAS Post-TOP Assay in WWTP F. Mean of triplicate samples; error bars represent standard errors.

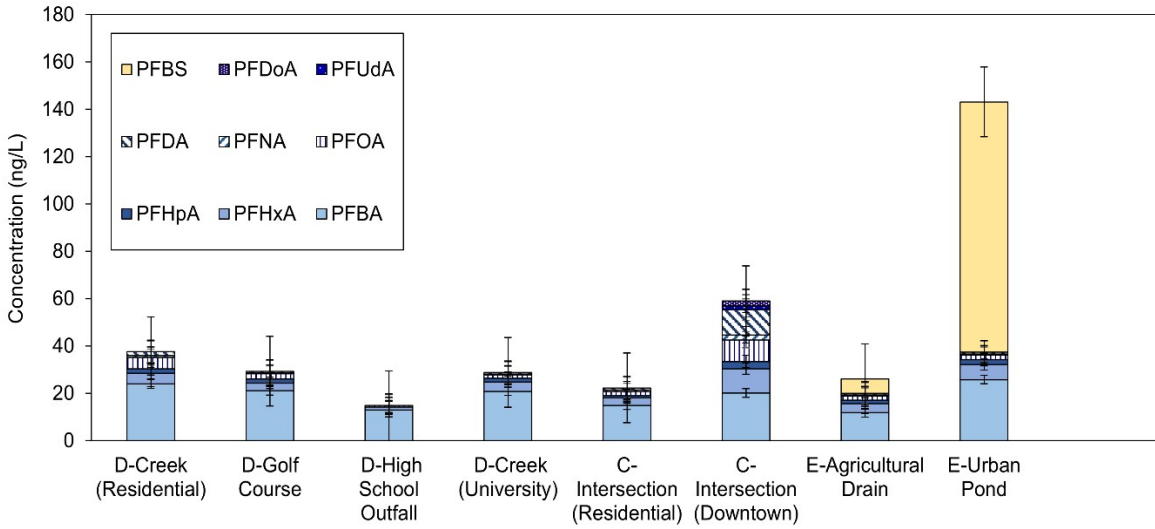

**Figure S12.** Distribution of PFAS Post-TOP Assay in Stormwater Samples. Mean of triplicate samples; error bars represent standard errors.

### Results: Precursor PFAS Fractions for Phase 1

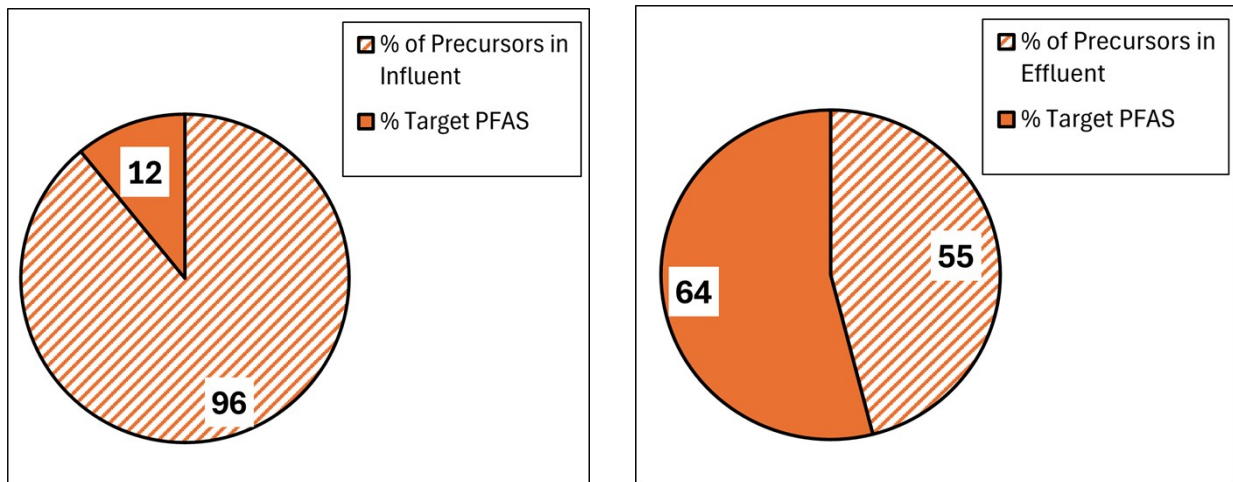

**Figure S13.** WWTP A influent (left) and effluent (right)

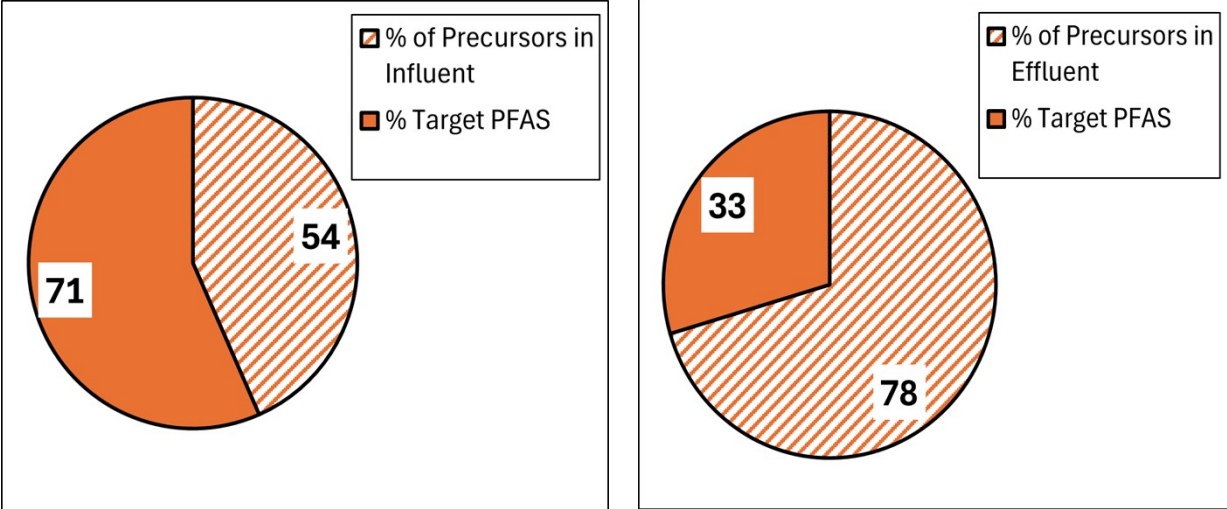

Figure S14. WWTP B (left) and effluent (right)

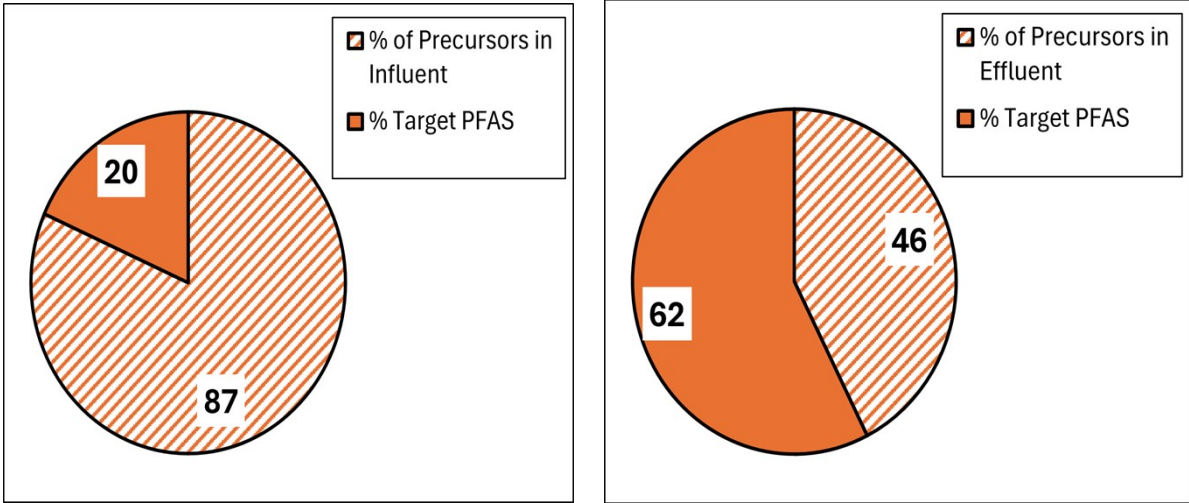

Figure S15. WWTP C influent (left) and effluent (right)

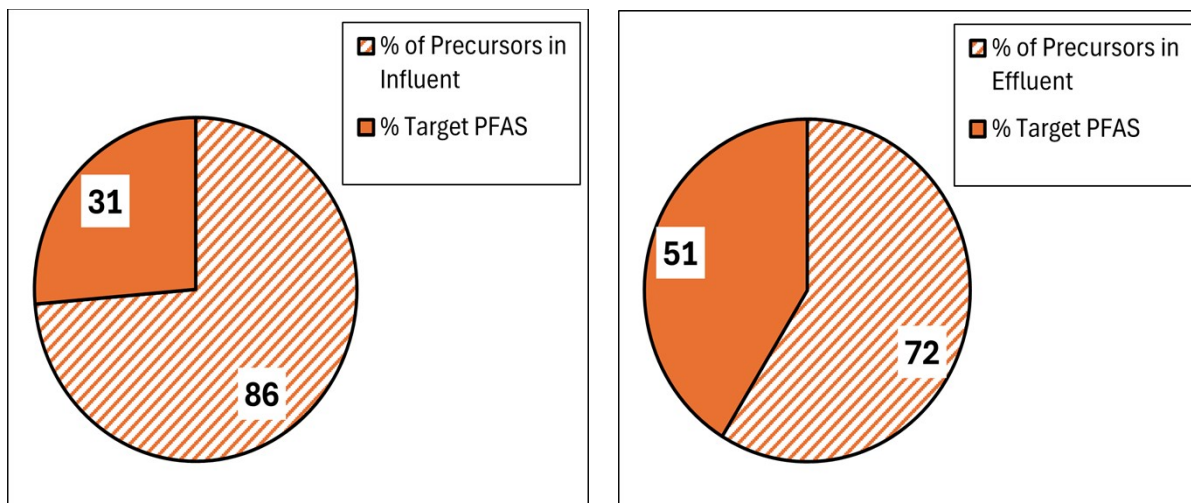

Figure S16. WWTP D influent (left) and effluent (right)

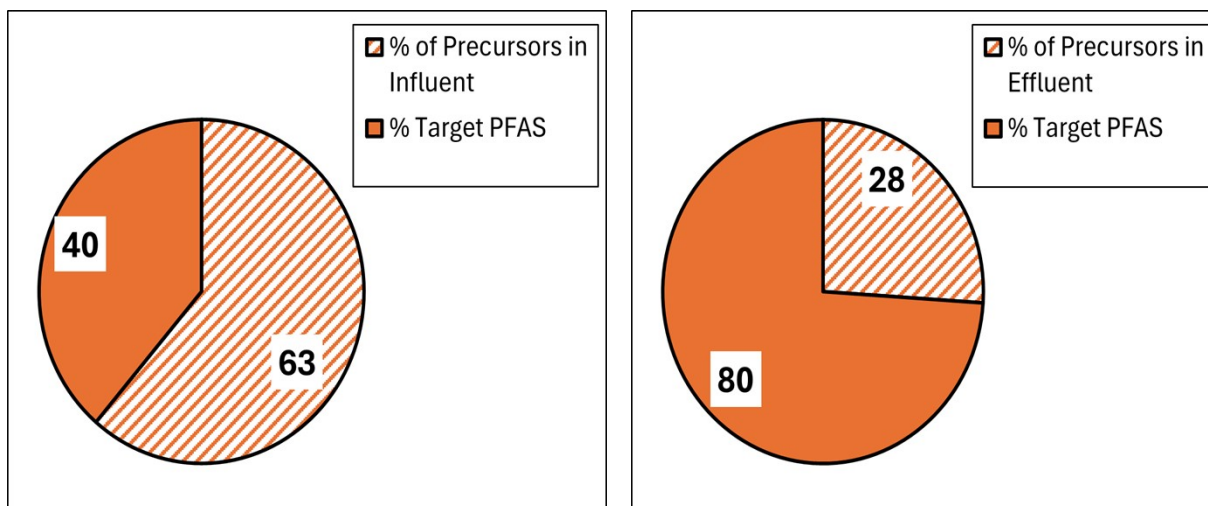

Figure S17. WWTP E influent (left) and effluent (right)

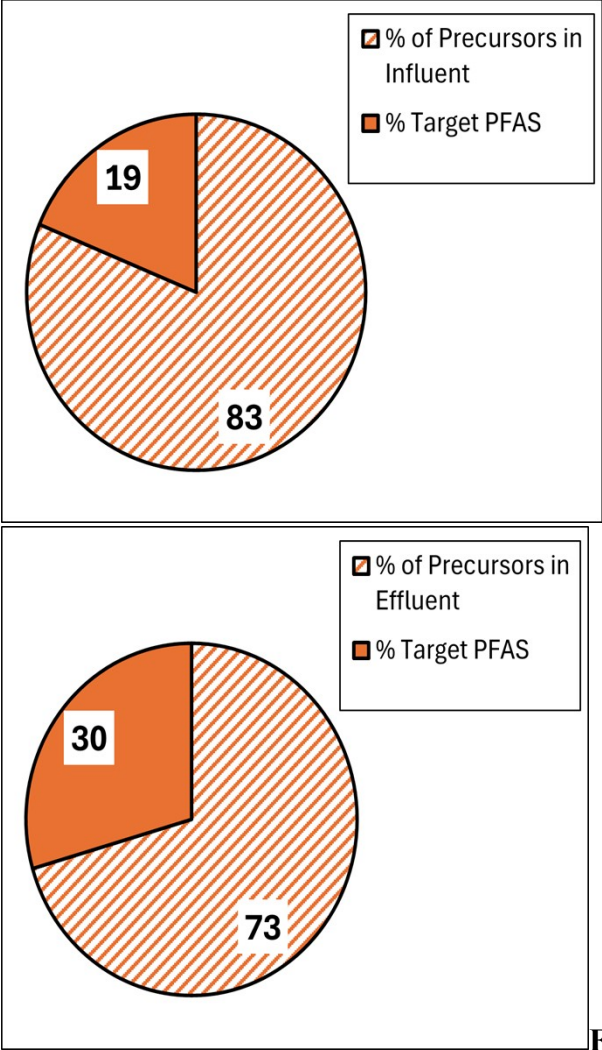

Figure S18. WWTP F influent (left) and effluent

(right)

Results: Precursor PFAS fractions for Phase 2

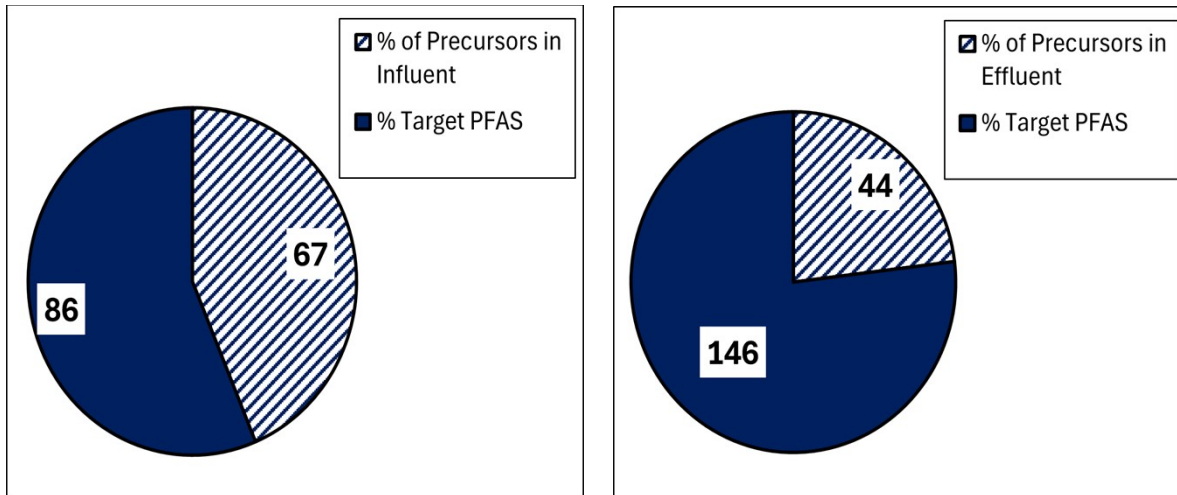

Figure S19. WWTP A influent (left) and effluent (right)

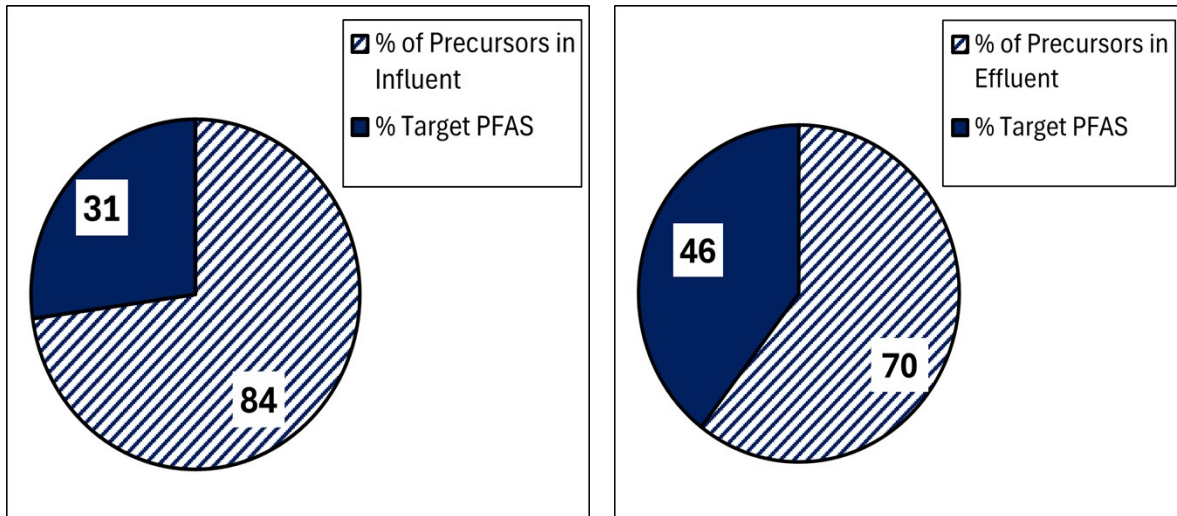

Figure S20. WWTP B influent (left) and effluent (right)

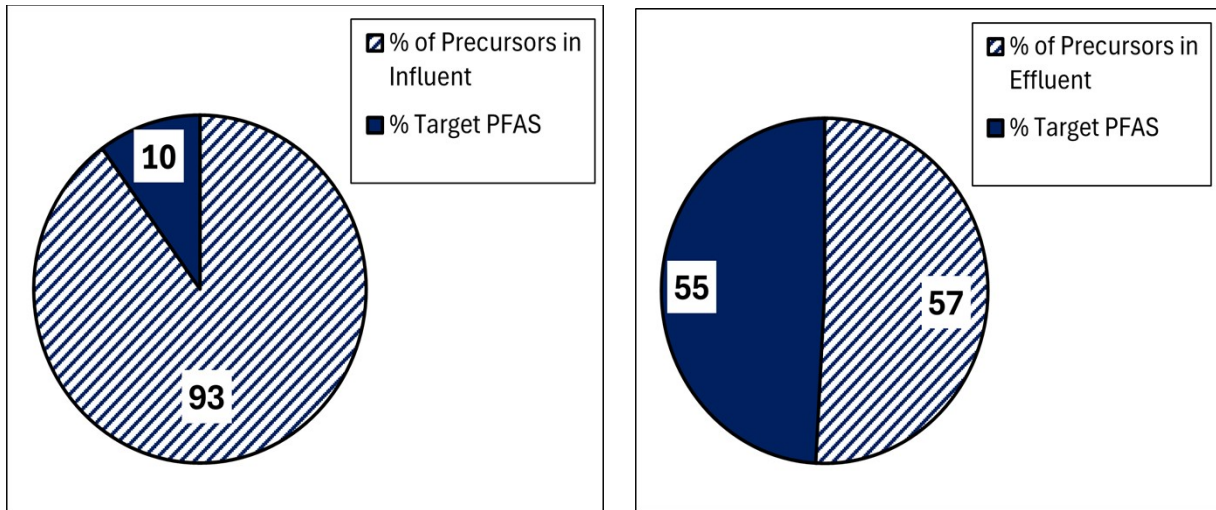

**Figure S21.** WWTP C influent (left) and effluent (right)

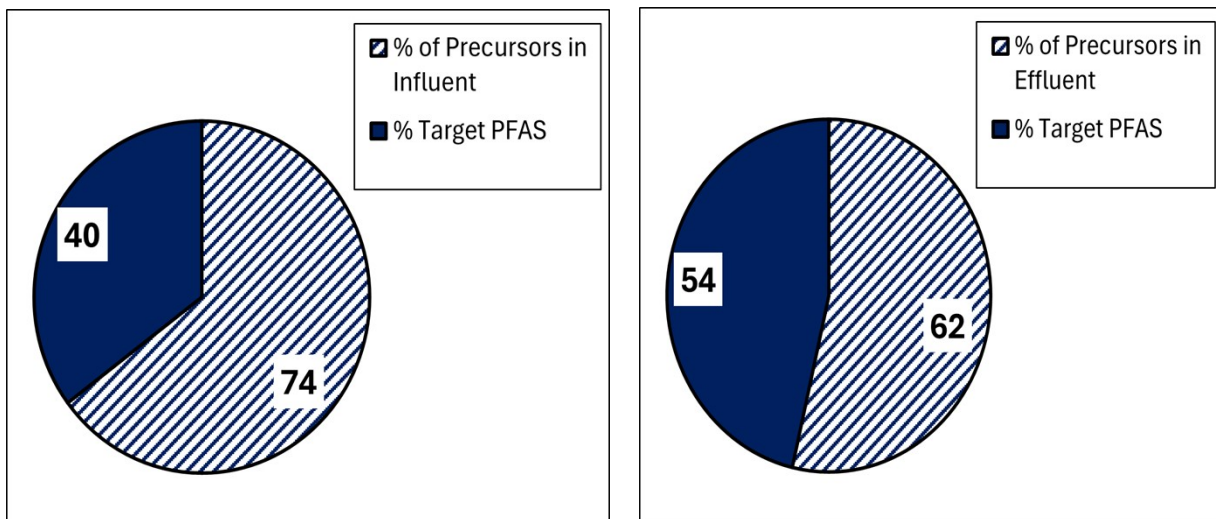

**Figure S22.** WWTP D influent (left) and effluent (right)

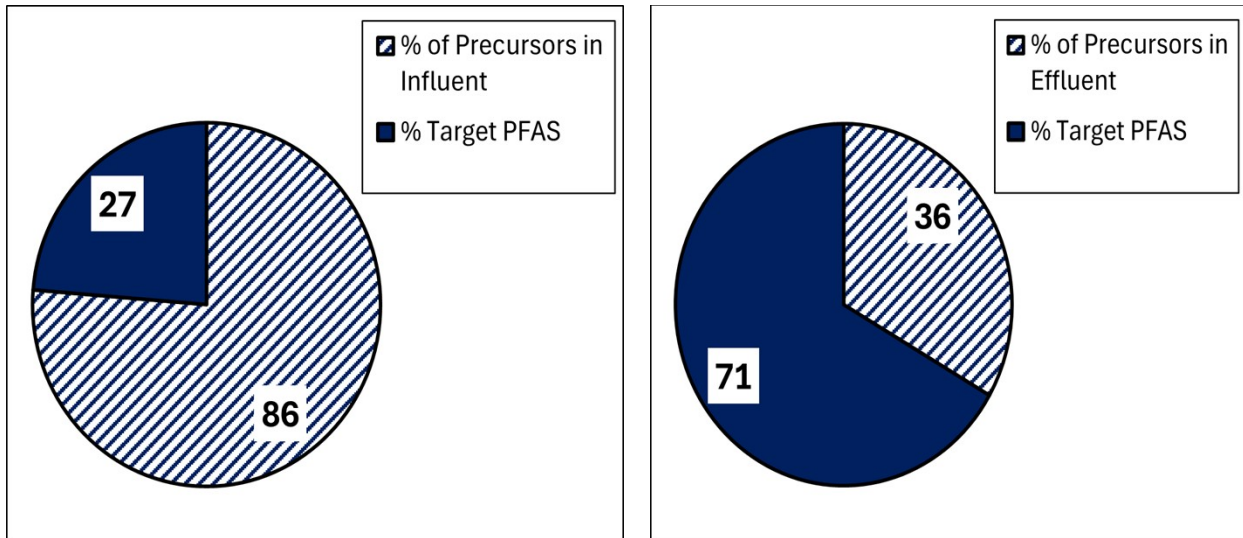

**Figure S23.** WWTP E influent (left) and effluent (right)

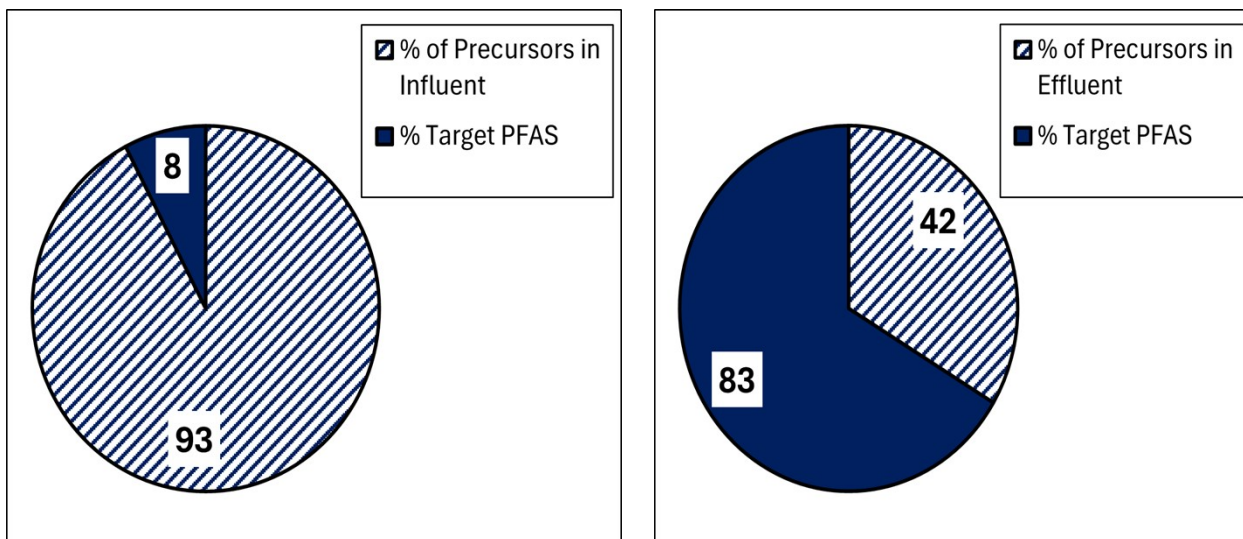

**Figure S24.** WWTP F influent (left) and effluent (right)

## References

- (1) US Department of Commerce, N. *Climate*.  
<https://www.weather.gov/wrh/climate?wfo=dmx> (accessed 2024-03-07).
- (2) Cappiella, K.; Brown, K. Impervious Cover and Land Use in the Chesapeake Bay Watershed. *Watershed Protection Techniques* **2001**, 3 (4), 0\_1.
- (3) Center for Watershed Protection; 8391 Main Street; Ellicott City, MD 21043. *New York State Stormwater Management Design Manual*.  
<https://extapps.dec.ny.gov/fs/docs/pdf/stormwaterdesignmanual2015.pdf>.
- (4) *The Simple Method to Calculate Urban Stormwater Loads*.  
<https://files.knowyourh2o.com/pdfs/The%20Simple%20Method%20to%20Calculate%20Urban%20Stormwater%20Loads.pdf>.
